# Supplementary material for: Evaluating COI and ITS2 dual barcoding for molecular delimitation and taxonomic insights in Arenosetella Wilson, 1932 (Harpacticoida: Ectinosomatidae) along Turkish Coasts
Source: PeerJ. 2025 Aug 21;13:e19870. doi: 10.7717/peerj.19870 (PMC12375299; doi:10.7717/peerj.19870)
Supplement: Supplemental Information 6 [file peerj-13-19870-s006.xlsx]

## Sheet: table S1
Station number	Locality	Coordinates	Region	Number of samples
st15	Viranşehir Beach / Mersin	36°44'21.4"N 34°32'28.7"E	MEDITERRENIAN SEA	8
st29	Gazipasa Marina / Antalya	36°16'08.2"N 32°16'47.0"E	MEDITERRENIAN SEA	7
st32	Alanya Beach / Antalya	36°32'04.0"N 32°02'01.7"E	MEDITERRENIAN SEA	3
st46	Kumlubük Beach	36°44'47.2"N 28°16'13.3"E	AGEAN SEA	5
st61	Pygeia Beach	37°54'04.4"N 27°16'21.2"E	AGEAN SEA	6
st78	Ece Harbour	40°21'45.1"N 26°19'25.5"E	AGEAN SEA	3
st97	Kurucaşile Beach / Bartın	41°50'41.0"N 32°43'30.7"E	BLACK SEA	6
st103	Aliköyü Beach / Sinop	41°56'29.9"N 34°39'26.2"E	BLACK SEA	4
st113	Keşap Beach / Giresun	40°56'42.3"N 38°35'17.3"E	BLACK SEA	4
