# Supplementary material for: Evaluating COI and ITS2 dual barcoding for molecular delimitation and taxonomic insights in Arenosetella Wilson, 1932 (Harpacticoida: Ectinosomatidae) along Turkish Coasts
Source: PeerJ. 2025 Aug 21;13:e19870. doi: 10.7717/peerj.19870 (PMC12375299; doi:10.7717/peerj.19870)
Supplement: Supplemental Information 7 [file peerj-13-19870-s007.xlsx]

## Sheet: table S2
	COI	ITS2
Arenosetella germanica st103H21	PV537519	PV547658
Arenosetella germanica st103H22	PV537520	PV547657
Arenosetella germanica st103H23	PV537522	PV547656
Arenosetella germanica st103H24	PV537521	PV547655
Arenosetella germanica st113H12	PV537516	PV547653
Arenosetella germanica st113H13	PV537515	PV547652
Arenosetella germanica st113H15	PV537517	PV547654
Arenosetella germanica st113H27	PV537518	PV547651
Arenosetella germanica st97H10	PV537528	PV547659
Arenosetella germanica st97H4	PV537523	PV547664
Arenosetella germanica st97H6	PV537524	PV547663
Arenosetella germanica st97H7	PV537525	PV547662
Arenosetella germanica st97H8	PV537526	PV547661
Arenosetella germanica st97H9	PV537527	PV547660
Arenosetella germanica st61H1	PV537532	PV547673
Arenosetella germanica st61H11	PV537537	PV547669
Arenosetella germanica st61H12	PV537533	PV547668
Arenosetella germanica st61H2	PV537534	PV547672
Arenosetella germanica st61H3	PV537535	PV547671
Arenosetella germanica st61H9	PV537536	PV547670
Arenosetella germanica st15H1	PV537553	PV547692
Arenosetella germanica st15H10	PV537558	PV547696
Arenosetella germanica st15H16	PV537559	PV547690
Arenosetella germanica st15H17	PV537560	PV547689
Arenosetella germanica st15H3	PV537554	PV547695
Arenosetella germanica st15H6	PV537556	PV547691
Arenosetella germanica st15H9	PV537557	PV547693
Arenosetella lanceorostrata st78H1	PV537529	PV547667
Arenosetella lanceorostrata st78H2	PV537531	PV547666
Arenosetella lanceorostrata st78H3	PV537530	PV547665
Arenosetella lanceorostrata st29H1	PV537546	PV547688
Arenosetella lanceorostrata st29H2	PV537547	PV547687
Arenosetella lanceorostrata st29H4	PV537548	PV547686
Arenosetella lanceorostrata st29H5	PV537549	PV547685
Arenosetella lanceorostrata st29H6	PV537550	PV547684
Arenosetella lanceorostrata st29H7	PV537551	PV547683
Arenosetella lanceorostrata st29H8	PV537552	PV547682
Arenosetella lanceorostrata st32H1	PV537543	PV547681
Arenosetella lanceorostrata st32H2	PV537545	PV547680
Arenosetella lanceorostrata st32H3	PV537544	PV547679
Arenosetella lanceorostrata st46H1	PV537538	PV547678
Arenosetella lanceorostrata st46H2	PV537539	PV547677
Arenosetella lanceorostrata st46H3	PV537540	PV547676
Arenosetella lanceorostrata st46H5	PV537541	PV547675
Arenosetella lanceorostrata st46H6	PV537542	PV547674
Arenosetella lanceorostrata st15H5	PV537555	PV547694
