# Supplementary material for: Evaluating COI and ITS2 dual barcoding for molecular delimitation and taxonomic insights in Arenosetella Wilson, 1932 (Harpacticoida: Ectinosomatidae) along Turkish Coasts
Source: PeerJ. 2025 Aug 21;13:e19870. doi: 10.7717/peerj.19870 (PMC12375299; doi:10.7717/peerj.19870)
Supplement: Supplemental Information 8 [file peerj-13-19870-s008.xlsx]

## Sheet: table S3
Region	Primer	Sequence (5' -> 3')	Length (bp)	Tm C°	Referances
ITS2	Cas5p8sFt	5'-TGAACATCGACATTTYGAACGCATAT-3'	27	53,2-54,8	Ji et al., (2003)
	Cas28sB1d	5'-TTCTTTTCCTCCSCTTAYTTGATATGCTTAA-3'	30	56,4-57,8	Ji et al., (2003)
COI (1st PCR)	CoxF	5'-GGTCCTGTAATCATAAAGAYATYGG-3'	25	52.8-56	Cheng et al., (2013)
	CoxR2	5'-GCGACTACATAATAAGTRTCRTG-3'	23	49.9-53.5	Cheng et al., (2013)
COI (2nd PCR)	Cop-coi + 20	5'-GACTAATCATAAAGATATTGGTAC-3'	25	48.8	Chang (2007)
	HCO2198	5'-TAAACTTCAGGGTGACCAAAAAATCA-3'	26	53.2	Folmer et al., (1994)
