# Supplementary material for: Evaluating COI and ITS2 dual barcoding for molecular delimitation and taxonomic insights in Arenosetella Wilson, 1932 (Harpacticoida: Ectinosomatidae) along Turkish Coasts
Source: PeerJ. 2025 Aug 21;13:e19870. doi: 10.7717/peerj.19870 (PMC12375299; doi:10.7717/peerj.19870)
Supplement: Supplemental Information 9 [file peerj-13-19870-s009.xlsx]

## Sheet: table S4
	Total (%)					1st codon position (%)					2nd codon position (%)					3rd codon position (%)
Sample name	T	C	A	G	GC	T-1	C-1	A-1	G-1	GC	T-2	C-2	A-2	G-2	GC	T-3	C-3	A-3	G-3	GC
Hap 4	34.69	21.27	26.55	17.50	38.76	25.79	19.91	26.24	28.05	47.96	43.89	23.98	14.03	18.10	42.08	34.39	19.91	39.37	6.33	26.24
Hap 5	34.54	21.42	26.40	17.65	39.06	25.79	19.91	26.24	28.05	47.96	43.89	23.98	14.03	18.10	42.08	33.94	20.36	38.91	6.79	27.15
Hap 6	34.54	21.42	26.55	17.50	38.91	25.79	19.91	26.24	28.05	47.96	43.89	23.98	14.03	18.10	42.08	33.94	20.36	39.37	6.33	26.70
Hap 7	34.84	21.12	26.55	17.50	38.61	25.79	19.91	26.24	28.05	47.96	43.89	23.98	14.03	18.10	42.08	34.84	19.46	39.37	6.33	25.79
Hap 8	34.69	21.27	26.55	17.50	38.76	25.79	19.91	26.24	28.05	47.96	43.89	23.98	14.03	18.10	42.08	34.39	19.91	39.37	6.33	26.24
Hap 9	34.54	21.42	26.55	17.50	38.91	25.79	19.91	26.24	28.05	47.96	43.89	23.98	14.03	18.10	42.08	33.94	20.36	39.37	6.33	26.70
Hap 10	34.54	21.42	26.40	17.65	39.06	25.79	19.91	26.24	28.05	47.96	43.89	23.98	14.03	18.10	42.08	33.94	20.36	38.91	6.79	27.15
Hap 11	38.31	14.18	25.04	22.47	36.65	32.13	11.76	26.70	29.41	41.18	43.44	22.62	14.03	19.91	42.53	39.37	8.14	34.39	18.10	26.24
Hap 12	38.31	14.18	24.89	22.62	36.80	32.13	11.76	26.70	29.41	41.18	43.44	22.62	14.03	19.91	42.53	39.37	8.14	33.94	18.55	26.70
Hap 13	35.14	22.93	21.87	20.06	42.99	25.34	19.91	25.79	28.96	48.87	43.44	24.43	14.03	18.10	42.53	36.65	24.43	25.79	13.12	37.56
Hap 14	35.29	22.78	21.72	20.21	42.99	25.79	19.46	25.79	28.96	48.42	43.44	24.43	14.03	18.10	42.53	36.65	24.43	25.34	13.57	38.01
Hap 15	37.86	14.33	25.49	22.32	36.65	32.13	11.76	26.70	29.41	41.18	43.44	22.62	14.03	19.91	42.53	38.01	8.60	35.75	17.65	26.24
Hap 16	37.41	14.63	25.34	22.62	37.25	31.67	12.22	26.70	29.41	41.63	43.44	22.62	14.03	19.91	42.53	37.10	9.05	35.29	18.55	27.60
Hap 17	37.41	14.63	25.49	22.47	37.10	31.67	12.22	26.70	29.41	41.63	43.44	22.62	14.03	19.91	42.53	37.10	9.05	35.75	18.10	27.15
Hap 18	31.52	23.98	24.43	20.06	44.04	23.53	21.72	26.70	28.05	49.77	43.44	24.43	14.48	17.65	42.08	27.60	25.79	32.13	14.48	40.27
Hap 19	38.16	13.73	26.40	21.72	35.44	31.67	11.22	26.70	29.41	41.63	43.44	22.62	14.03	19.91	42.53	39.37	6.33	38.46	15.84	22.17
Hap 20	31.37	23.98	24.89	19.76	43.74	23.53	21.72	27.15	27.60	49.32	43.44	24.43	14.48	17.65	42.08	27.15	25.79	33.03	14.03	39.82
Hap 21	31.52	23.98	24.59	19.91	43.89	23.53	21.72	26.70	28.05	49.77	43.44	24.43	14.48	17.65	42.08	27.60	25.79	32.58	14.03	39.82
Hap 22	31.52	24.13	24.43	19.91	44.04	23.53	21.72	26.70	28.05	49.77	43.44	24.43	14.48	17.65	42.08	27.60	26.24	32.13	14.03	40.27
Mean	35.06	19.83	25.27	19.84	39.67	27.22	17.77	26.46	28.55	46.32	43.61	23.70	14.12	18.58	42.27	34.37	18.03	35.22	12.38	30.41
