# Supplementary material for: Evaluating COI and ITS2 dual barcoding for molecular delimitation and taxonomic insights in Arenosetella Wilson, 1932 (Harpacticoida: Ectinosomatidae) along Turkish Coasts
Source: PeerJ. 2025 Aug 21;13:e19870. doi: 10.7717/peerj.19870 (PMC12375299; doi:10.7717/peerj.19870)
Supplement: Supplemental Information 10 [file peerj-13-19870-s010.xlsx]

## Sheet: Table S5
Sample Name	U %	C %	A %	G %	GC %	Lenght (bp)
Set_ 1	24.3	27.0	19.5	29.2	56.2	226
Set_ 2	24.3	27.0	19.9	28.8	55.8	226
Set_ 3	22.1	32.0	15.2	30.7	62.8	231
Set_ 4	22.0	31.3	17.2	29.5	60.8	227
Set_ 5	22.1	32.5	15.6	29.9	62.3	231
Set_ 6	22.5	32.0	15.6	29.9	61.9	231
Set_ 7	23.5	29.1	17.1	30.3	59.4	234
Set_ 8	22.5	31.6	16.0	29.9	61.5	231
Set_ 9	23.5	29.1	16.7	30.8	59.8	234
Mean	23.0	30.2	16.9	29.9	60.1	230.1
