# Supplementary material for: Evaluating COI and ITS2 dual barcoding for molecular delimitation and taxonomic insights in Arenosetella Wilson, 1932 (Harpacticoida: Ectinosomatidae) along Turkish Coasts
Source: PeerJ. 2025 Aug 21;13:e19870. doi: 10.7717/peerj.19870 (PMC12375299; doi:10.7717/peerj.19870)
Supplement: Supplemental Information 11 [file peerj-13-19870-s011.xlsx]

## Sheet: table S6
Sample Name	Length (bp)
	Helix I	Helix II	Helix III	Helix IV
Set_ 1	35	27	95	31
Set_ 2	35	27	95	31
Set_ 3	33	44	89	32
Set_ 4	31	27	156	-
Set_ 5	33	44	89	32
Set_ 6	33	44	89	32
Set_ 7	37	27	157	-
Set_ 8	33	44	89	32
Set_ 9	37	27	157	-
